# Supplementary material for: Theranostic Approach for Metastatic Pigmented Melanoma Using ICF15002, a Multimodal Radiotracer for Both PET Imaging and Targeted Radionuclide Therapy
Source: PubMed Central journal article supplement — Neoplasia. 2016 Dec 14;19(1):17–27. doi: 10.1016/j.neo.2016.11.001 (PMC5157796; doi:10.1016/j.neo.2016.11.001), 2016-12-14
Supplement: mmc2.pdf [file mmc2.pdf]

# Supplementary figures

**Figure 1: (A) Bimodal Concept (Imaging/Therapy). (B) Radiosynthesis of [<sup>131</sup>I]ICF15002. (C) Chromatogram of [<sup>131</sup>I]ICF15002.**

**A**

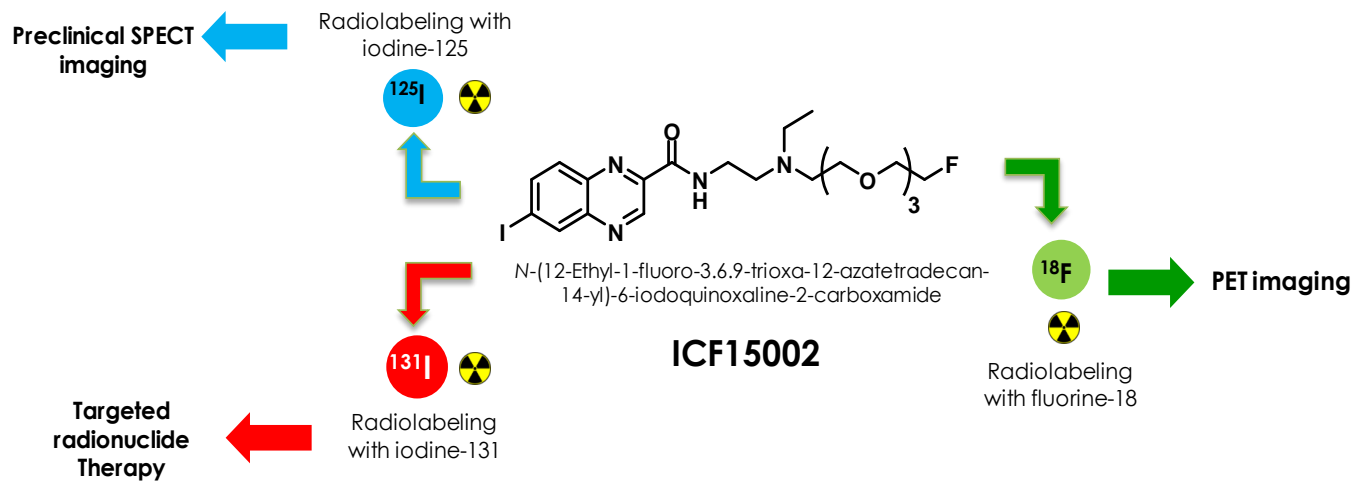

**B**

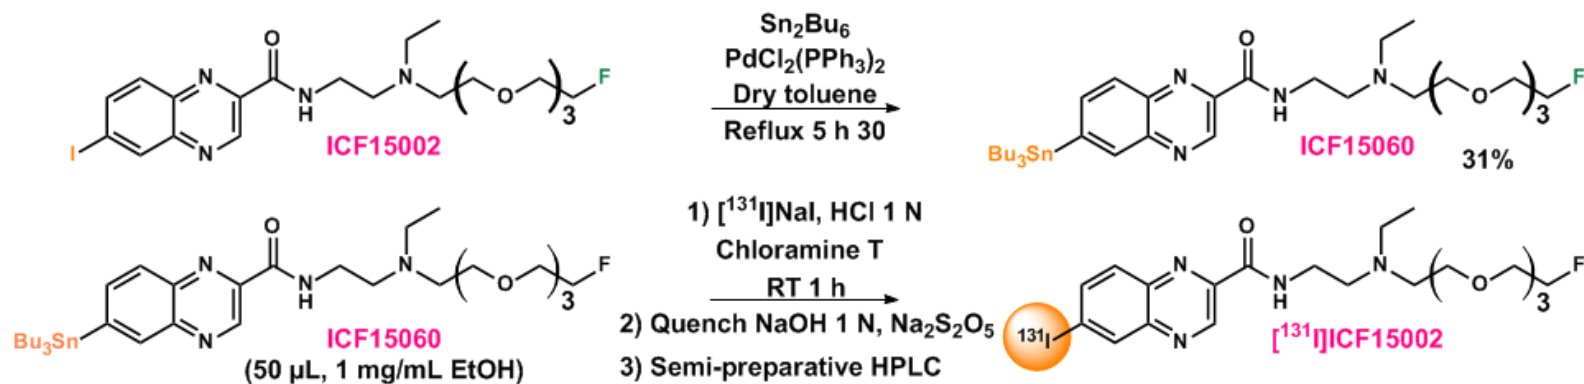

**C**

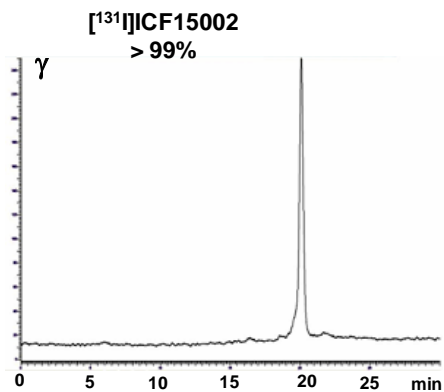

**Table 1:** *Ex vivo* biodistribution of [<sup>18</sup>F]ICF15002 in tumor and tissues of B16BL6 primary melanoma-bearing C57BL/6J mice and human SK-MEL-3 primary melanoma-bearing Swiss nude mice. Data were obtained at 0.5, 1 and 2 h post i.v. injection of the radiotracer. Results were expressed as percentage of injected dose per gram of tissue (%ID/g) after decay correction.

|                               | <b>B16BL6 melanoma-bearing mice</b> |                 |                 | <b>SK-MEL-3 melanoma-bearing mice</b> |                 |                 | <b>A375 melanoma-bearing mice</b> |                 |                 |
|-------------------------------|-------------------------------------|-----------------|-----------------|---------------------------------------|-----------------|-----------------|-----------------------------------|-----------------|-----------------|
|                               | <b>0.5 h p.i.</b>                   | <b>1 h p.i.</b> | <b>2 h p.i.</b> | <b>0.5 h p.i.</b>                     | <b>1 h p.i.</b> | <b>2 h p.i.</b> | <b>0.5 h p.i.</b>                 | <b>1 h p.i.</b> | <b>2 h p.i.</b> |
| <b>Tumor</b>                  | 11.92±2.12                          | 14.05±1.40      | 13.07±1.22      | 4.9± 0.70                             | 7.06 ±1.23      | 3.42±0.38       | 2.00±1.01                         | 1.15±1.13       | 1.23±0.26       |
| <b>Eyes</b>                   | 16.92±2.49                          | 18.36±4.56      | 18.17±3.15      | 1.92± 0.43                            | 2.66 ±0.21      | 2.58±0.80       | 1.83±0.08                         | 1.65±0.57       | 2.27±0.50       |
| <b>Muscle</b>                 | 1.88±0.31                           | 1.17± 0.12      | 0.92±0.15       | 1.7±0.26                              | 1.7 ±0.18       | 1.50±0.36       | 1.67±0.34                         | 1.59±0.61       | 1.43±0.80       |
| <b>Blood</b>                  | 1.37±0.60                           | 1.42±0.31       | 1.12±0.24       | 1.7± 0.29                             | 2.03± 0.28      | 1.62±0.31       | 1.93±0.21                         | 1.60±0.37       | 1.67±0.77       |
| <b>Skin</b>                   | 2.11±0.29                           | 1.44± 0.34      | 1.51±0.53       | 2.41± 0.44                            | 2.26 ±0.19      | 1.78±0.36       | 2.56±0.47                         | 1.87±0.22       | 1.61±0.29       |
| <b>Bone</b>                   | 2.67±0.12                           | 1.40±0.15       | 1.96±0.51       | 1.8± 0.21                             | 2.03±0.02       | 2.79±0.67       | 1.72±0.15                         | 2.18±1.08       | 2.15±0.42       |
| <b>Stomach</b>                | 7.55±2.35                           | 4.41±1.34       | 2.48±0.88       | 3.33±0.92                             | 3.46±0.43       | 2.62±0.72       | 3.43±2.19                         | 4.50±4.03       | 3.35±2.79       |
| <b>Small intestine</b>        | 7.93±0.86                           | 7.58±2.08       | 4.28±1.18       | 5.51± 1.29                            | 5.35±0.36       | 3.24±1.03       | 5.18±0.59                         | 6.77±3.60       | 4.06±1.82       |
| <b>Colon+Faeces</b>           | 4.16±0.32                           | 7.17±2.94       | 6.05±1.72       | 3.61± 0.62                            | 3.73±0.66       | 3.40±0.98       | 3.08±0.19                         | 4.18±0.69       | 3.83±0.66       |
| <b>Ceacum</b>                 | 3.73±0.22                           | 7.27±0.62       | 8.94±1.78       | 3.54± 1.06                            | 5.14±0.53       | 5.51±1.44       | 3.62±0.77                         | 5.69±1.99       | 6.25±0.56       |
| <b>Kidney</b>                 | 7.97±1.78                           | 3.46±0.58       | 2.18±0.43       | 5.01± 0.61                            | 2.82±0.08       | 2.18±0.38       | 4.74±1.32                         | 3.76±2.07       | 2.37±0.95       |
| <b>Spleen</b>                 | 7.76±1.24                           | 3.72±1.52       | 2.88±2.11       | 4.63± 1.32                            | 2.4±0.24        | 1.96±0.39       | 3.72±0.08                         | 2.49±0.82       | 2.04±1.01       |
| <b>Pancreas</b>               | 3.34±0.69                           | 2.09±0.51       | 1.33±0.28       | 2.36± 0.2                             | 1.64±0.21       | 1.31±0.41       | 2.33±0.53                         | 2.86±2.93       | 1.36±0.67       |
| <b>Liver</b>                  | 3.32±0.26                           | 2.56±0.29       | 1.88±0.34       | 2.45± 0.12                            | 2.19±0.15       | 1.80±0.30       | 2.58±0.50                         | 2.75±1.42       | 2.30±1.30       |
| <b>Lung</b>                   | 4.87±0.87                           | 1.86±0.16       | 1.65±0.11       | 3.61± 0.16                            | 2.66±0.31       | 2.31±0.33       | 3.20±0.58                         | 3.15±1.43       | 2.42±1.12       |
| <b>Heart</b>                  | 2.94±0.27                           | 2.72±0.22       | 2.14±0.33       | 2.31± 0.25                            | 2.26±0.11       | 2.24±0.43       | 2.16±0.22                         | 2.55±0.73       | 2.13±0.93       |
| <b>Brain</b>                  | 1.66±0.10                           | 1.82±0.10       | 1.39±0.25       | 1.66± 0.32                            | 1.92±0.15       | 1.89±0.46       | 1.49±0.26                         | 2.30±1.03       | 1.63±0.70       |
| <b>Tumour-to-muscle ratio</b> | 6.42±1.033                          | 12.12±1.74      | 14.46±2.62      | 2.96±0.80                             | 4.23±1.11       | 2.36±0.62       | 1.24± 0.71                        | 0.97±1.23       | 1.06±0.64       |
| <b>Tumour-to-blood ratio</b>  | 10.03±5.01                          | 10.241±2.49     | 12.19±3.32      | 2.94±0.67                             | 3.56±0.99       | 2.16±0.44       | 1.07±0.59                         | 0.79±0.82       | 0.92±0.66       |
| <b>Tumour-to-bone ratio</b>   | 4.47±0.81                           | 10.11±1.43      | 7.13±2.21       | 2.76±0.59                             | 3.46±0.59       | 1.27±0.31       | 1.18±0.62                         | 0.62±0.71       | 0.59±0.20       |

**Figure 2:** (A) Effect of [<sup>131</sup>I]ICF15002 treatment (2 X 20 MBq) on B16BL6 murine melanoma tumor growth. [<sup>131</sup>I]ICF15002 was administered at day-7 and day-11 after inoculation. Arrows indicate treatment days. Tumor growth was evaluated by measuring the tumor volume of each mouse thrice per week during treatment and twice per week thereafter until a volume of 2 cm<sup>3</sup> was reached. (B) Effect of [<sup>131</sup>I]ICF15002 on human melanoma SK-MEL-3 tumor growth. [<sup>131</sup>I]ICF15002 was administered at 25 MBq once weekly for 2 or 3 weeks. Tumor growth was evaluated by measuring the tumor volume of each mouse thrice per week during treatment and twice per week thereafter until a volume of 2 cm<sup>3</sup> was reached. Data are expressed as the percentage variation in tumor volume relative to baseline. Data are expressed as the percentage variation in tumor volume relative to baseline.

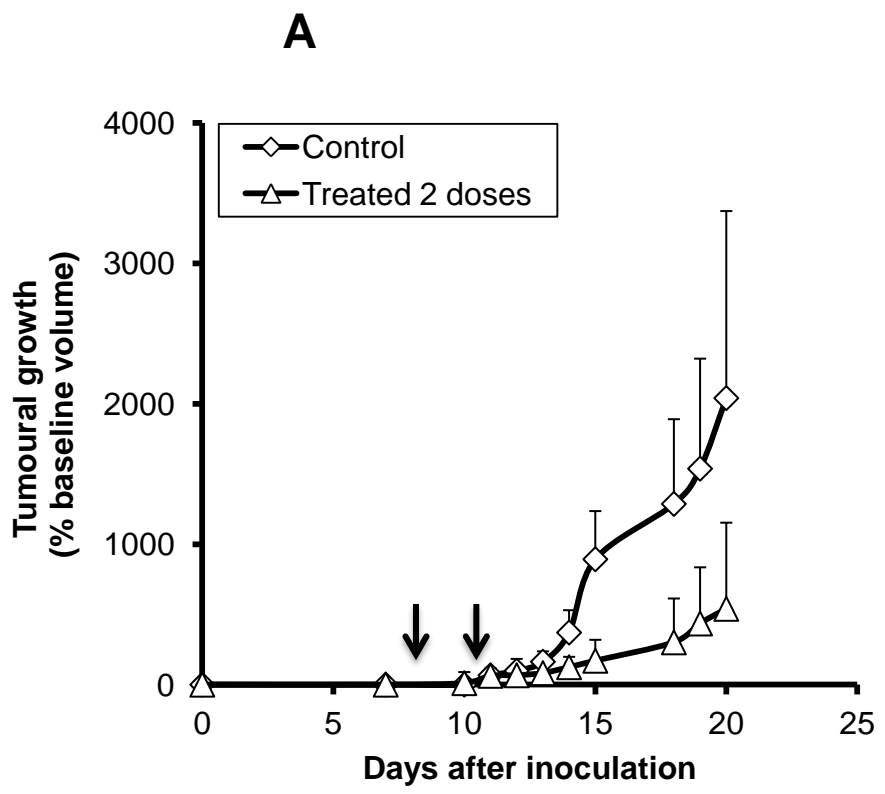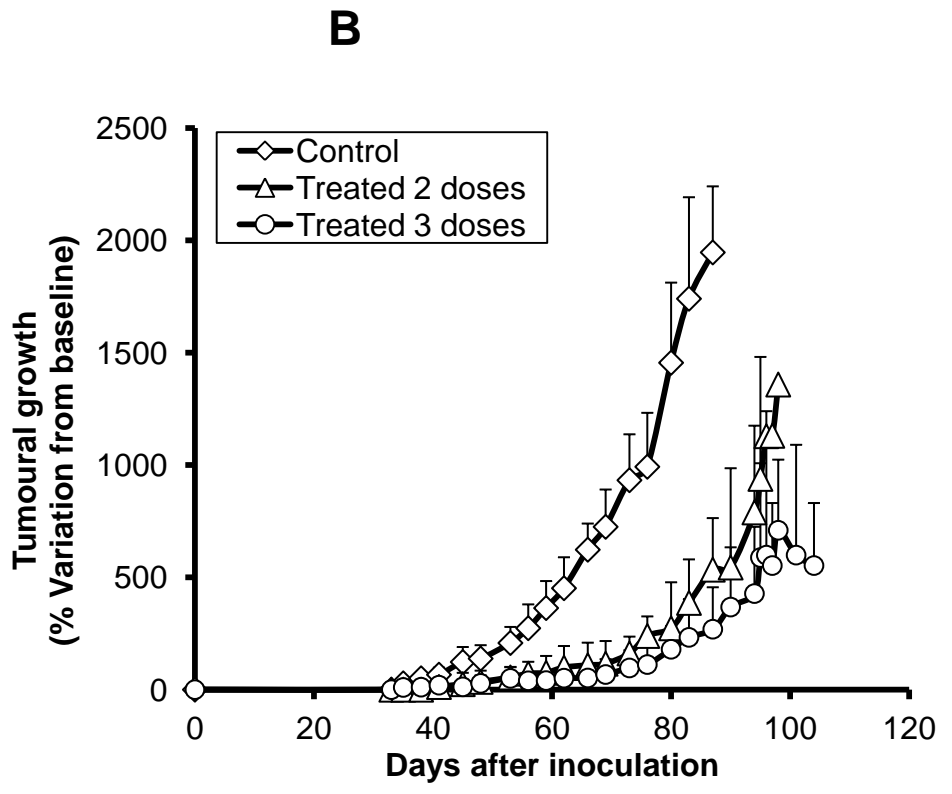

**Table 2:** *Ex vivo* biodistribution of [<sup>125</sup>I]ICF15002 in tumor and tissues and organs in B16BL6 melanoma C57BL/6J bearing mice at different time points post tracer injection.

**B16BL6 melanoma C57BL/6J-bearing mice**

| <b>Organs</b>          | <b>1 h</b>  | <b>3 h</b>  | <b>6 h</b>  | <b>24 h</b> | <b>72 h</b> | <b>10 d</b> |
|------------------------|-------------|-------------|-------------|-------------|-------------|-------------|
| <b>Blood</b>           | 0.97±0.07   | 0.82±0.05   | 0.62±0.20   | 0.06±0.01   | 0.03±0.01   | 0.00±0.00   |
| <b>Tumor</b>           | 11.99±3.52  | 17.69±1.10  | 12.04±4.39  | 10.47±3.22  | 8.74±0.38   | 1.20±0.54   |
| <b>Eyes</b>            | 15.01±4.84  | 15.48±2.57  | 17.40±2.21  | 20.30±6.08  | 14.87±1.18  | 9.97±2.24   |
| <b>Liver</b>           | 6.33±1.69   | 3.37±0.14   | 2.02±0.64   | 0.46±0.10   | 0.08±0.00   | 0.01±0.00   |
| <b>Kidney</b>          | 4.75±0.71   | 3.14±1.27   | 1.56±0.82   | 0.15±0.02   | 0.24±0.04   | 0.04±0.03   |
| <b>Skin</b>            | 1.04±0.06   | 1.34±0.72   | 0.62±0.31   | 0.17±0.00   | 0.50±0.26   | 0.05±0.06   |
| <b>Adipose</b>         | 0.61±0.01   | 0.36±0.05   | 0.19±0.06   | 0.028±0.00  | 0.02±0.00   | 0.01±0.01   |
| <b>Muscle</b>          | 0.55±0.16   | 0.30±0.04   | 0.17±0.07   | 0.02±0.00   | 0.02±0.00   | 0.01±0.06   |
| <b>Bone</b>            | 0.79±0.09   | 0.48±0.03   | 0.30±0.10   | 0.03±0.00   | 0.02±0.01   | 0.01±0.01   |
| <b>Colon</b>           | 4.51±4.40   | 21.19±18.02 | 15.92±9.97  | 0.69±0.23   | 0.25±0.10   | 0.02±0.01   |
| <b>Ceacum</b>          | 4.97±3.01   | 25.73±7.88  | 23.31±16.47 | 0.41±0.13   | 0.33±0.29   | 0.02±0.02   |
| <b>Small intestine</b> | 16.68±10.70 | 4.16±0.70   | 2.23±1.35   | 0.12±0.03   | 0.07±0.03   | 0.01±0.00   |
| <b>Stomach</b>         | 9.2±1.49    | 4.53±0.94   | 7.39±4.08   | 0.54±0.25   | 0.16±0.05   | 0.03±0.01   |
| <b>Spleen</b>          | 2.14±0.20   | 2.37±2.58   | 6.45±8.15   | 0.06±0.01   | 0.52±0.96   | 0.23±0.41   |
| <b>Pancreas</b>        | 2.96±0.15   | 1.48±0.07   | 0.65±0.18   | 0.05±0.01   | 0.03±0.01   | 0.02±0.03   |
| <b>Lung</b>            | 3.12±0.42   | 2.14±0.27   | 1.04±0.37   | 0.08±0.01   | 0.05±0.01   | 0.01±0.01   |
| <b>Heart</b>           | 1.17±0.07   | 0.77±0.05   | 0.46±0.17   | 0.16±0.06   | 0.08±0.02   | 0.03±0.01   |
| <b>Brain</b>           | 0.27±0.03   | 0.15±0.01   | 0.08±0.03   | 0.01±0.01   | 0.01±0.00   | 0.00±0.00   |
| <b>Testis</b>          | 0.68±0.19   | 0.54±0.03   | 0.36±0.08   | 0.03±0.01   | 0.02±0.00   | 0.00±0.00   |
| <b>Thyroid</b>         | 15.33±2.65  | 46.68±9.65  | 89.32±13.31 | 99.51±14.67 | 62.11±9.42  | 9.30±1.09   |

**Table 3: (A)** [<sup>125</sup>I]ICF15002 metabolism in different tissues and fluids of B16BL6 primary melanoma-bearing C57BL/6J mice. **(B)** Analytical HPLC chromatogram of ICF15002 and its metabolites. [<sup>125</sup>I]ICF15002, [<sup>125</sup>I]M1, [<sup>125</sup>I]M2, [<sup>125</sup>I]M3, [<sup>125</sup>I]M4 and [<sup>125</sup>I]<sup>-</sup> were identified by comparison of their retention time with their nonradioactive counterparts

| % of radioactivity                 | 1 h p.i.      | 3 h p.i.       | 6 h p.i. | 24 h p.i.               | 72 h p.i.   | 10 d p.i.   |
|------------------------------------|---------------|----------------|----------|-------------------------|-------------|-------------|
| <b>Tumor</b>                       |               |                |          |                         |             |             |
| [ <sup>125</sup> I]ICF15002        | 90%           | 91%            | 90%      | 93%                     | 92%         | >99%        |
| [ <sup>125</sup> I] <sup>-</sup>   | 10%           | 7%             | 9%       | 0%                      | 0%          | 0%          |
| <b>Eyes</b>                        |               |                |          |                         |             |             |
| [ <sup>125</sup> I] ICF15002       | 91%           | 95%            | 96%      | 90%                     | 97%         | >99%        |
| [ <sup>125</sup> I] <sup>-</sup>   | 10%           | 6%             | 4%       | 0%                      | 0%          | 0%          |
| <b>Blood</b>                       |               |                |          |                         |             |             |
| [ <sup>125</sup> I] ICF15002       | 2%            | 0%             | 4%       | <i>n.d.<sup>a</sup></i> | <i>n.d.</i> | <i>n.d.</i> |
| [ <sup>125</sup> I]M1              | 22%           | 12%            | 11%      | <i>n.d.</i>             | <i>n.d.</i> | <i>n.d.</i> |
| [ <sup>125</sup> I] <sup>-</sup>   | 77%           | 89%            | 86%      | <i>n.d.</i>             | <i>n.d.</i> | <i>n.d.</i> |
| <b>Liver</b>                       |               |                |          |                         |             |             |
| [ <sup>125</sup> I] ICF15002       | 28%           | 24%            | 9%       | 0%                      | <i>n.d.</i> | <i>n.d.</i> |
| [ <sup>125</sup> I]M4              | 8%            | 0%             | 0%       | 0%                      | <i>n.d.</i> | <i>n.d.</i> |
| [ <sup>125</sup> I]M3              | 26%           | 46%            | 55%      | 71%                     | <i>n.d.</i> | <i>n.d.</i> |
| [ <sup>125</sup> I] <sup>-</sup>   | 20%           | 22%            | 30%      | 30%                     | <i>n.d.</i> | <i>n.d.</i> |
| [ <sup>125</sup> I]X1 <sup>b</sup> | 9%            | 10%            | 5%       | 0%                      | <i>n.d.</i> | <i>n.d.</i> |
| <b>Kidneys</b>                     |               |                |          |                         |             |             |
| [ <sup>125</sup> I] ICF15002       | 13%           | 6%             | 0%       | <i>n.d.</i>             | <i>n.d.</i> | <i>n.d.</i> |
| [ <sup>125</sup> I]M3              | 19%           | 12%            | 0%       | <i>n.d.</i>             | <i>n.d.</i> | <i>n.d.</i> |
| [ <sup>125</sup> I]M1              | 29%           | 34%            | 43%      | <i>n.d.</i>             | <i>n.d.</i> | <i>n.d.</i> |
| [ <sup>125</sup> I] <sup>-</sup>   | 21%           | 37%            | 57%      | <i>n.d.</i>             | <i>n.d.</i> | <i>n.d.</i> |
| [ <sup>125</sup> I]X1              | 9%            | 9%             | 0%       | <i>n.d.</i>             | <i>n.d.</i> | <i>n.d.</i> |
| <b>Urine</b>                       |               |                |          |                         |             |             |
| [ <sup>125</sup> I] ICF15002       | 13%           | 0%             | 0%       | 0%                      | 0%          | <i>n.d.</i> |
| [ <sup>125</sup> I]M3              | 7%            | 13%            | 4%       | 0%                      | 0%          | <i>n.d.</i> |
| [ <sup>125</sup> I]M2              | 30%           | 24%            | 21%      | 7%                      | 0%          | <i>n.d.</i> |
| [ <sup>125</sup> I]M1              | 17%           | 20%            | 16%      | 4%                      | 0%          | <i>n.d.</i> |
| [ <sup>125</sup> I] <sup>-</sup>   | 26%           | 31%            | 51%      | 85%                     | 99%         | <i>n.d.</i> |
| <b>Faeces</b>                      |               |                |          |                         |             |             |
|                                    | <b>0-24 h</b> | <b>24-48 h</b> |          |                         |             |             |
| [ <sup>125</sup> I] ICF15002       | 5%            | 3%             |          |                         |             |             |
| [ <sup>125</sup> I]M4              | 7%            | 3%             |          |                         |             |             |
| [ <sup>125</sup> I]M3              | 16%           | 14%            |          |                         |             |             |
| [ <sup>125</sup> I]M1              | 8%            | 8%             |          |                         |             |             |
| [ <sup>125</sup> I] <sup>-</sup>   | 8%            | 27%            |          |                         |             |             |
| [ <sup>125</sup> I]X2 <sup>b</sup> | 10%           | 8%             |          |                         |             |             |
| [ <sup>125</sup> I]X3 <sup>b</sup> | 39%           | 31%            |          |                         |             |             |
| [ <sup>125</sup> I]X4 <sup>b</sup> | 8%            | 5%             |          |                         |             |             |

<sup>a</sup>n.d. non detectable

<sup>b</sup>non identified metabolites

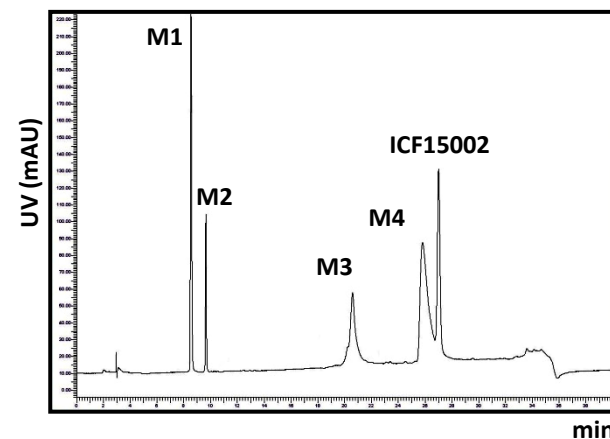

min
